# Supplementary material for: Optical sensing of amine vapors with a series of tin compoundsElectronic supplementary information (ESI) available: experimental section. See http://www.rsc.org/suppdata/cc/b4/b406230b/
Source: Royal Society of Chemistry journal article supplement (doi:10.1039/b406230b), 2004-01-01
Supplement: b406230b.pdf [file b406230b.pdf]

# Optical Sensing of a Series of Tin Compounds with Amine Vapors

Evonne A. Baldauff<sup>a</sup> and Jillian M. Buriak<sup>a,b,\*</sup>

<sup>a</sup> Department of Chemistry, Purdue University, West Lafayette, IN 47907-2084.

<sup>b</sup> Department of Chemistry, and the National Institute for Nanotechnology (NINT), University of Alberta, Edmonton, AB, T6R 2Z4, Canada. E-mail: jburiak@ualberta.ca

## 1. Other tin compounds tested for emission with irradiation with 254 nm and 365 nm UV light.

**Table S11** Summary of tin compounds with and without room temperature emission.

| Emitting                                          | Non-Emitting                                                      |                                                                    |
|---------------------------------------------------|-------------------------------------------------------------------|--------------------------------------------------------------------|
| SnSO <sub>4</sub>                                 | SnF <sub>2</sub>                                                  | SnF <sub>4</sub>                                                   |
| Sn(CH <sub>3</sub> SO <sub>3</sub> ) <sub>2</sub> | SnCl <sub>2</sub>                                                 |                                                                    |
| Sn(CF <sub>3</sub> SO <sub>3</sub> ) <sub>2</sub> | SnBr <sub>2</sub>                                                 | SnBr <sub>4</sub>                                                  |
| SnFPO <sub>3</sub>                                | SnI <sub>2</sub>                                                  | SnI <sub>4</sub>                                                   |
|                                                   | SnO                                                               | SnO <sub>2</sub>                                                   |
|                                                   | SnS                                                               |                                                                    |
|                                                   | Sn(CH <sub>3</sub> COO) <sub>2</sub>                              | Sn(CH <sub>3</sub> COO) <sub>4</sub>                               |
|                                                   | Sn(C <sub>32</sub> H <sub>16</sub> N <sub>8</sub> )               | Sn(C <sub>32</sub> H <sub>16</sub> N <sub>8</sub> )Cl <sub>2</sub> |
|                                                   | SnP <sub>2</sub> O <sub>7</sub>                                   |                                                                    |
|                                                   | Sn(O <sub>2</sub> CC <sub>17</sub> H <sub>35</sub> ) <sub>2</sub> |                                                                    |

## 2. Effects of other vapors on the different tin(II) salts.

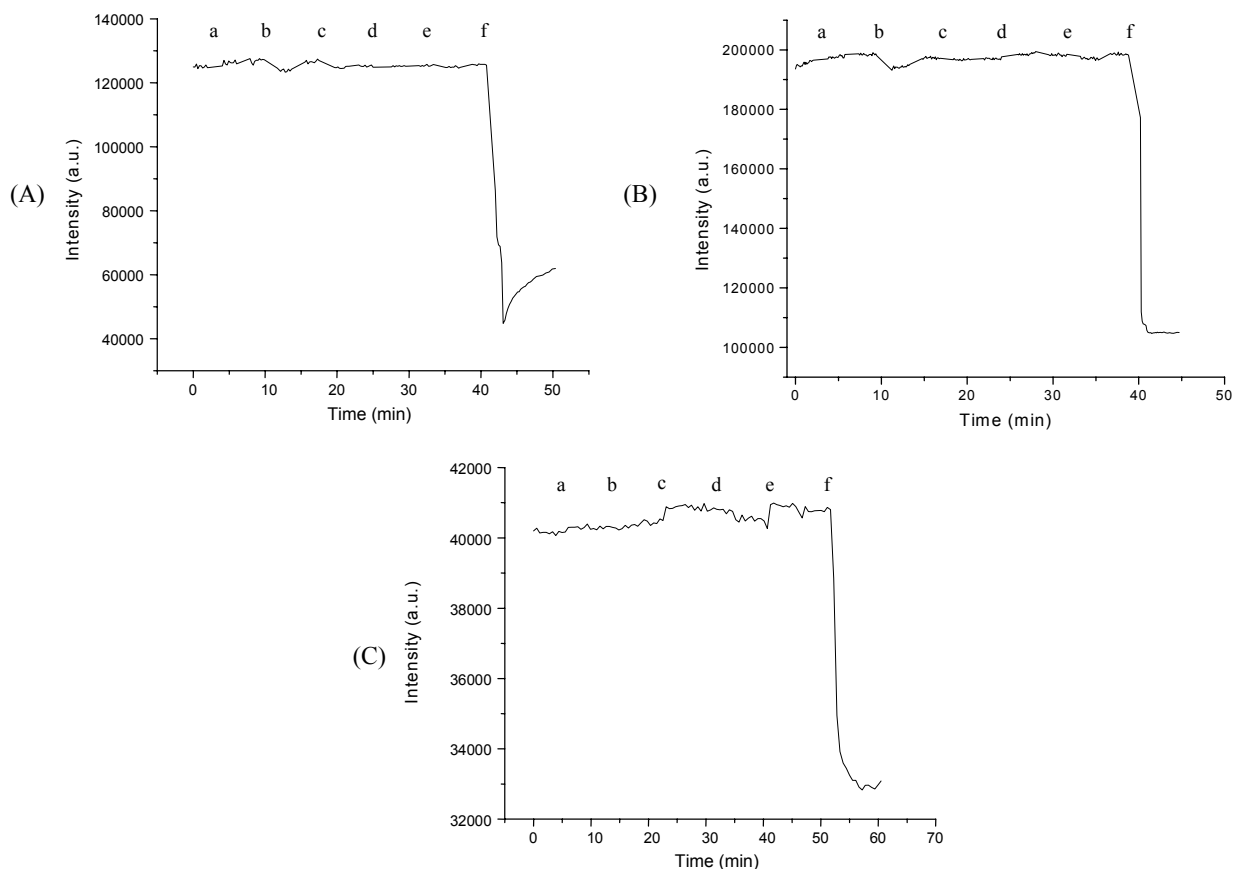

**Figure S12** Continuum exposure plots. a= dichloromethane, b= acetone, c= diethylether, d= pentane, e= ethanol, and f is a final amine, all 50 ppm concentrations. Plot A shows tin(II) methanesulfonate being quenched by 50 ppm pyridine [f], and plot B the same material except that the final amine, [f], is ammonia. Plot C is tin(II) sulfate and the final amine is 50 ppm triethylamine [f]. In each plot, the material is exposed to the analyte, held for 3-5 min and then purged with nitrogen for 3-5 min before the next analyte is introduced.

### 3. Exposure to tri-n-butylphosphine.

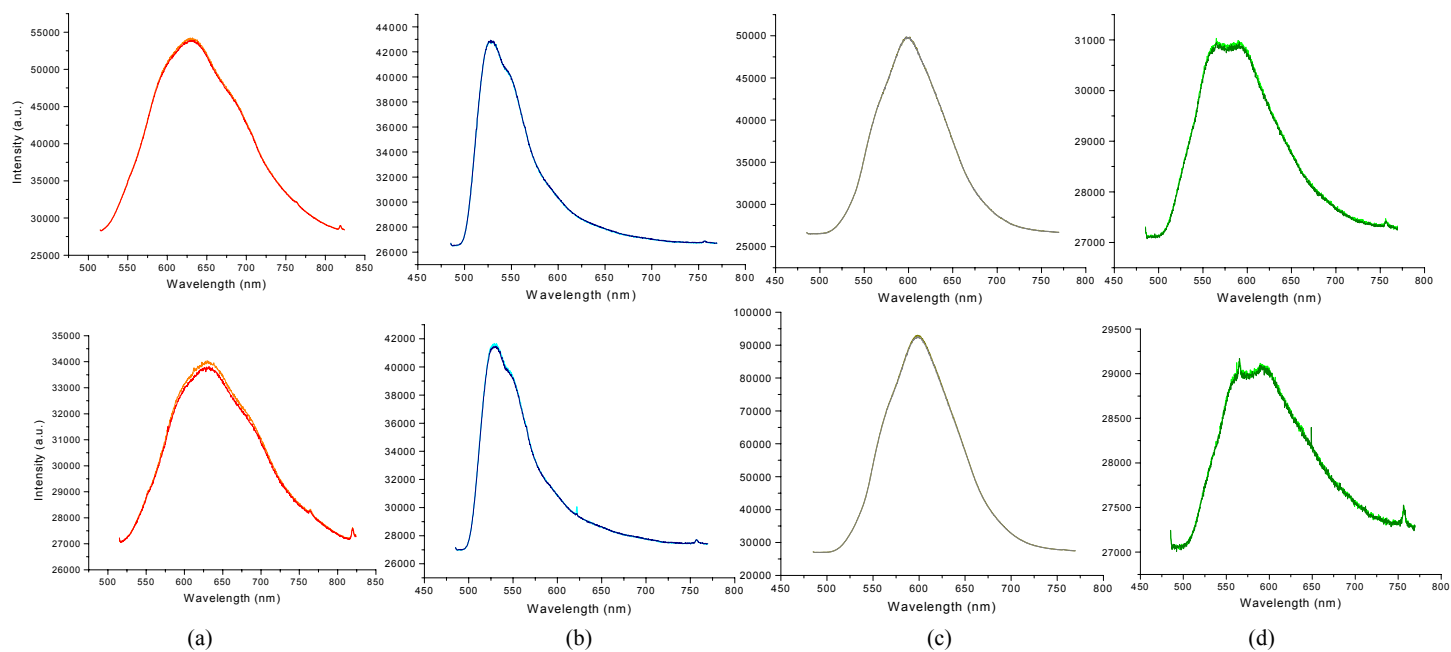

**Figure S13** Photoluminescence profiles of the four tin salts before and after exposure to 1 ppm (top) and 50 ppm (bottom) tri-n-butylphosphine. (a)  $\text{SnSO}_4$  (b)  $\text{SnFPO}_3$  (c)  $\text{Sn}(\text{CH}_3\text{SO}_3)_2$  (d)  $\text{Sn}(\text{CF}_3\text{SO}_3)_2$

### 4. Exposure to a 100 ppb concentration of pyridine.

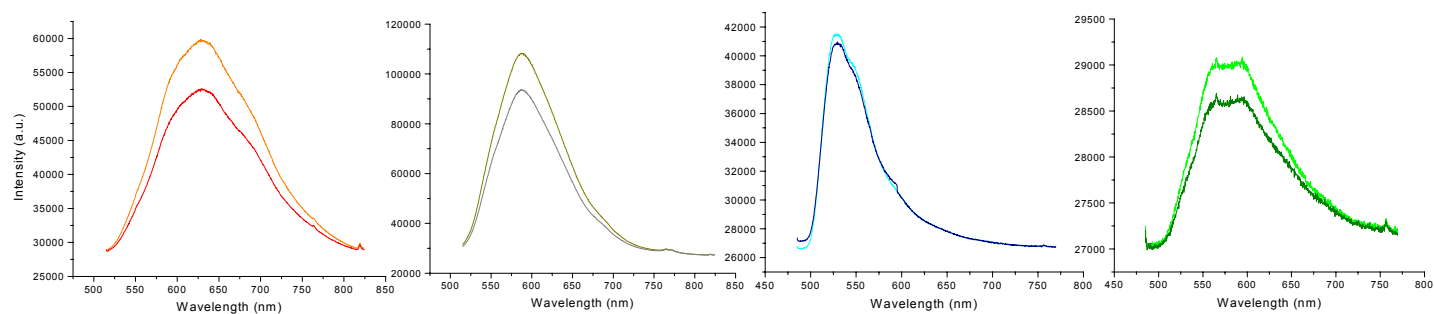

**Figure S14** Quenching with can occur at very low concentrations; here the array is exposed to 100 ppb pyridine.

5. Effect of humidity on the four tin(II) salts.

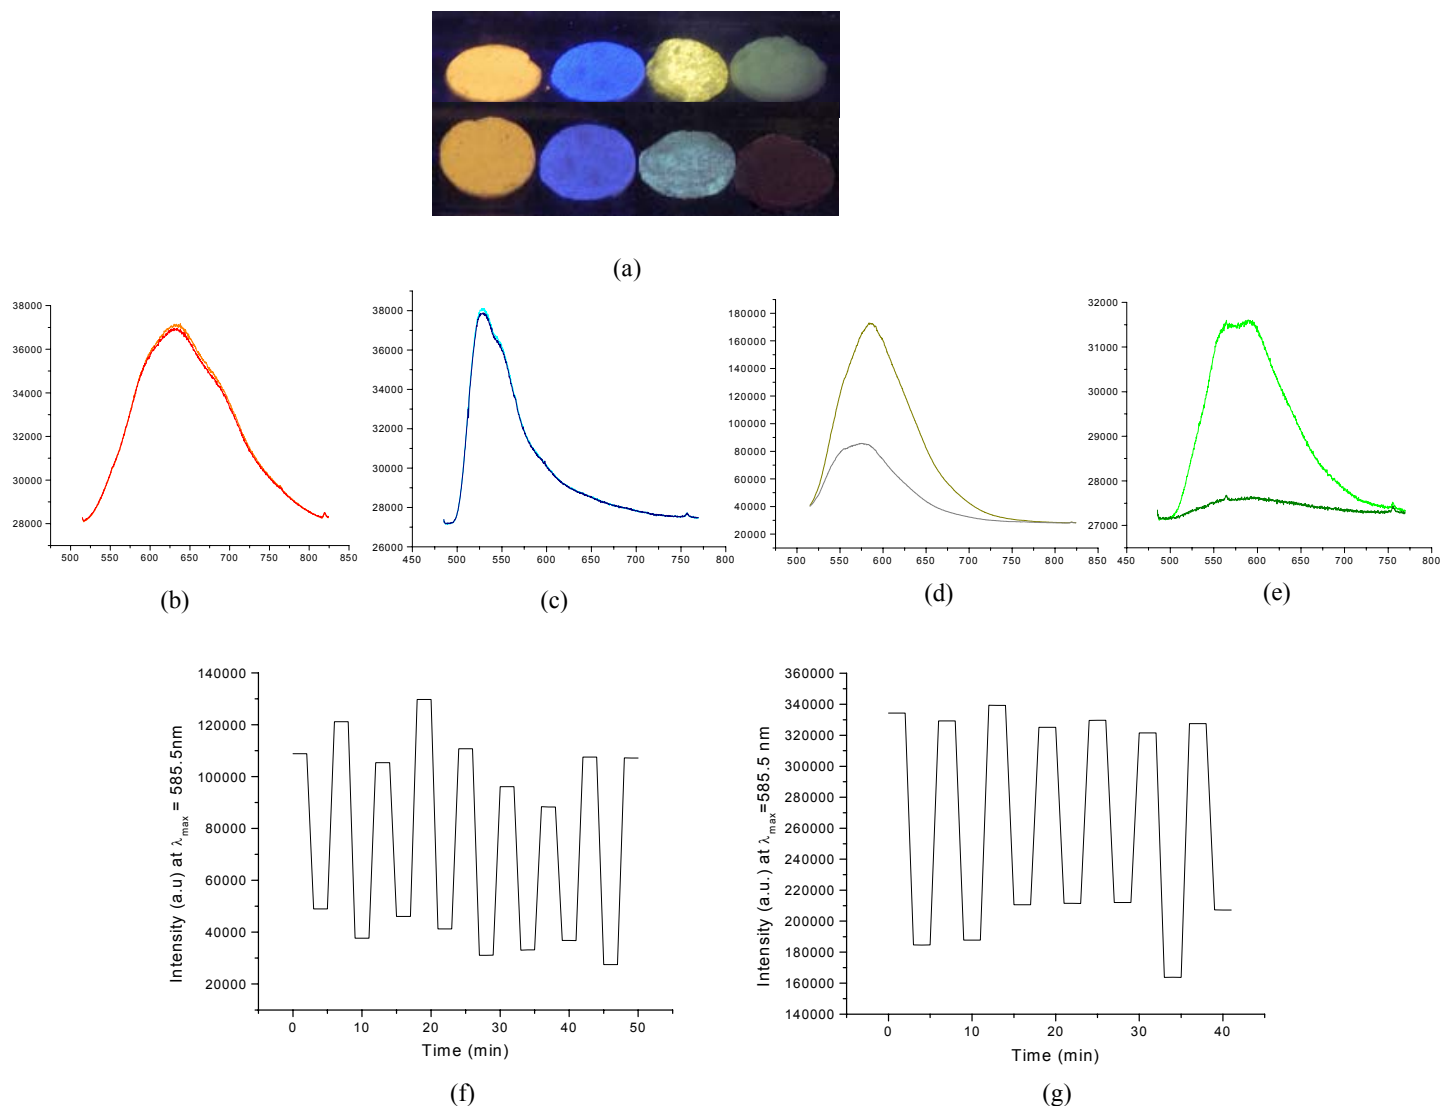

**Figure S15** (a) Effects of 40% humidity on the sensing array (left to right:  $\text{SnSO}_4$ ,  $\text{SnFPO}_3$ ,  $\text{Sn}(\text{CH}_3\text{SO}_3)_2$ ,  $\text{Sn}(\text{CF}_3\text{SO}_3)_2$ ). While  $\text{SnSO}_4$  (b) and  $\text{SnFPO}_3$  (c) PL remains unaffected,  $\text{Sn}(\text{CH}_3\text{SO}_3)_2$  (d) and  $\text{Sn}(\text{CF}_3\text{SO}_3)_2$  (e) emission is altered. Photoluminescence from  $\text{Sn}(\text{CH}_3\text{SO}_3)_2$  and  $\text{Sn}(\text{CF}_3\text{SO}_3)_2$  can be regenerated by heating at  $100^\circ\text{C}$  for 5 minutes and 20 minutes respectively. Cycling at 40% humidity (f) and 80% humidity (g) with  $\text{Sn}(\text{CH}_3\text{SO}_3)_2$  reveals a highly reusable method of detection. Here the system was exposed to humidity, held steady for three min., heated for 5 min., and held again for 3 min before the next humidity exposure.

**6. Regeneration of Sn(CH<sub>3</sub>SO<sub>3</sub>)<sub>2</sub> and SnSO<sub>4</sub> with TFA vapors.**

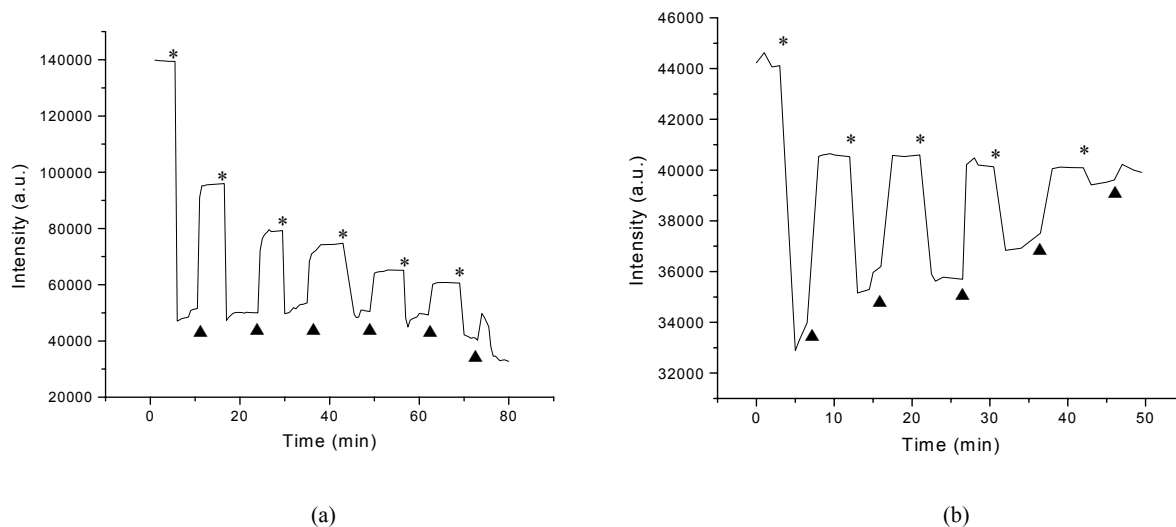

**Figure S16** While TFA does induce some photoluminescence restoration, intensity never reaches the initial levels. Sn(CH<sub>3</sub>SO<sub>3</sub>)<sub>2</sub> (a) and SnSO<sub>4</sub> (b) are exposed to 20 ppm pyridine (\*) for 2 minutes followed by a nitrogen purge for ~3 minutes, and then TFA was introduced (▲) for 2 minutes and held for another ~3 minutes followed also by a nitrogen purge. In the final cycle, the sample has become completely saturated.

**7. Reversibility of Tin(II) fluorophosphate with nitrogen after exposure to 1ppm of pyridine.**

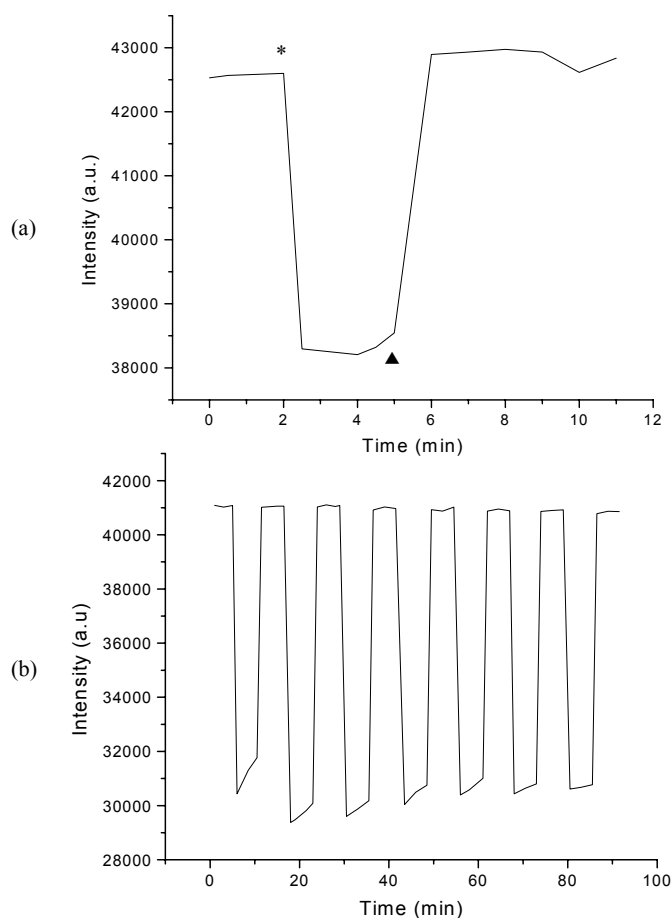

**Figure S17** Quenched light emission from SnFPO<sub>3</sub> can be quickly regenerated with a nitrogen flush. (a) Restoration after an exposure to 1 ppm pyridine. (b) Repeated cycling occurs after exposure to 100 ppm pyridine; the system was held under pyridine atmosphere (\*) for 5 minutes before a 5 minute nitrogen purge (▲).

NO TEXT BELOW THIS LINE

8. SEM images of the four tin salt pellets.

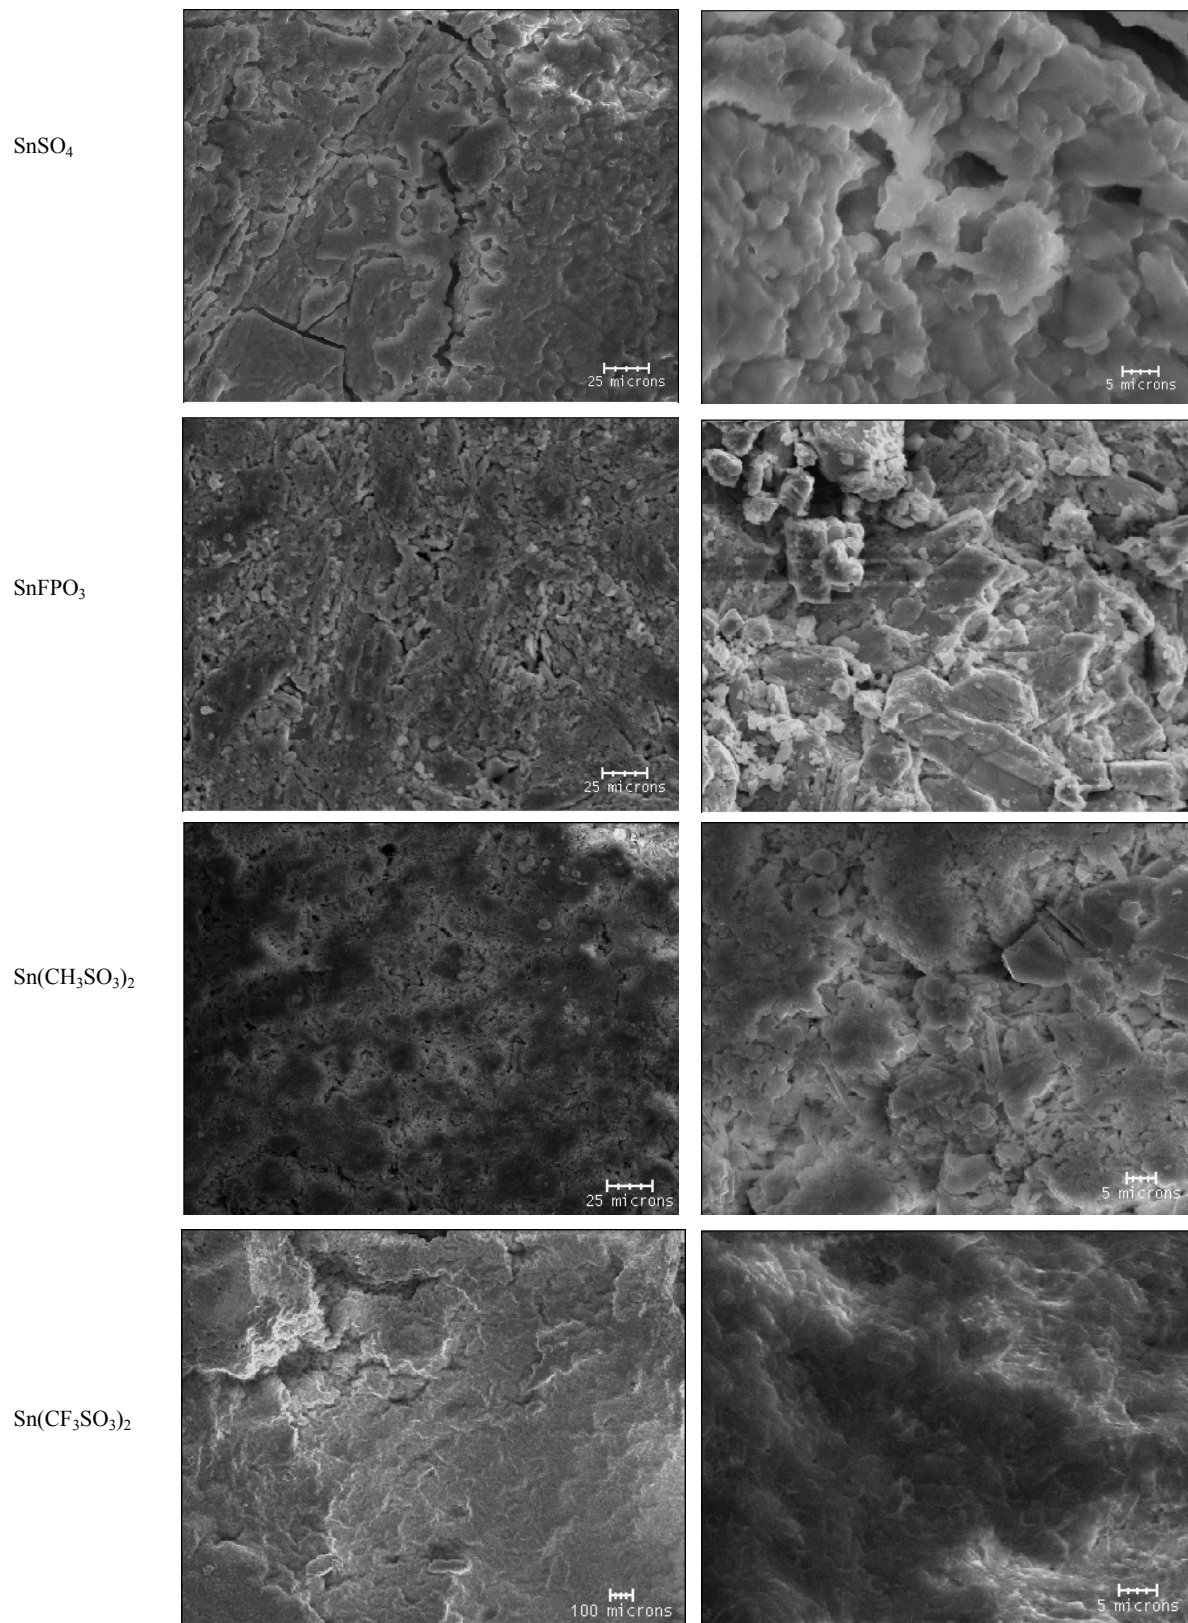

**Figure S18** Comparison of the surface features of each pellet, showing the rough and expected high surface area morphology for these pressed powders.
